# Supplementary material for: Pro-Apoptotic and Anti-Migration Properties of a Thiazoline-Containing Platinum(II) Complex in MDA-MB-231 Breast Cancer Cells: The Role of Melatonin as a Synergistic Agent
Source: MDPI journal article supplement (doi:10.3390/antiox11101971), 2022-10-01
Supplement: s1 [file s1]

## Supplementary Material

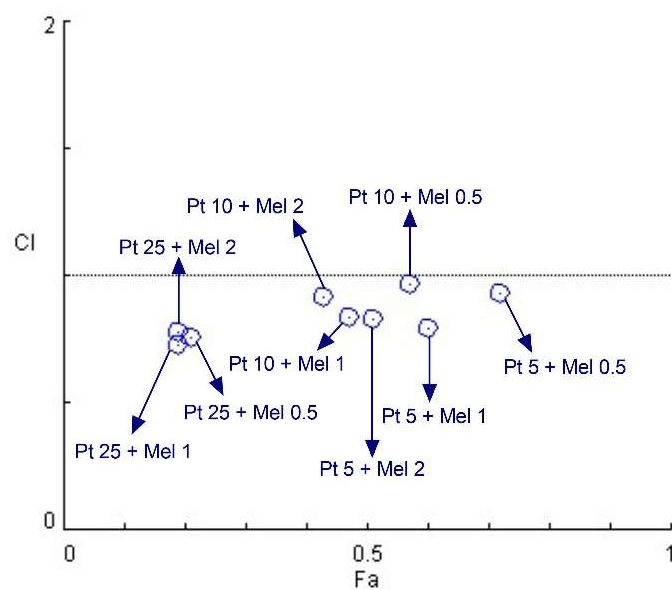

**Figure S1.** Synergistic effect of the combination of PtDPhPzTn and melatonin in MDA-MB-231 cells. It is shown an estimation plot of the combination treatment by Compusyn software with combination index (CI) values (y-axis) and fraction affected (Fa, x-axis). For the calculation, PtDPhPzTn (Pt; 5, 10 and 25  $\mu$ M) and melatonin (Mel; 0.5, 1 and 2 mM) were used to induced cell death at the concentrations indicated for 24 h.

**Table S1.** Calculation of the combination index (CI) data for non-constant combination of PtDPhPzTn and melatonin in cell death induction.

| <b>PtDPhPzTn (<math>\mu</math>M)</b> | <b>Melatonin (mM)</b> | <b>Effect (Fa)</b> | <b>CI</b> |
|--------------------------------------|-----------------------|--------------------|-----------|
| 5                                    | 0.5                   | 0.72               | 0.93      |
| 10                                   | 0.5                   | 0.57               | 0.96      |
| 25                                   | 0.5                   | 0.21               | 0.75      |
| 5                                    | 1                     | 0.60               | 0.79      |
| 10                                   | 1                     | 0.47               | 0.83      |
| 25                                   | 1                     | 0.19               | 0.72      |
| 5                                    | 2                     | 0.51               | 0.83      |
| 10                                   | 2                     | 0.45               | 0.91      |
| 25                                   | 2                     | 0.19               | 0.77      |
